# Supplementary material for: Blocking Ubiquitin‐Specific Protease 7 Induces Ferroptosis in Gastric Cancer via Targeting Stearoyl‐CoA Desaturase
Source: PubMed Central journal article supplement (PMC11095140; doi:10.1002/advs.202307899), 2024-03-09
Supplement: ADVS-11-2307899-s001.pdf [file ADVS-11-2307899-s001.pdf]

## Supporting Information

for *Adv. Sci.*, DOI 10.1002/adv.202307899

Blocking Ubiquitin-Specific Protease 7 Induces Ferroptosis in Gastric Cancer via Targeting Stearoyl-CoA Desaturase

*Xiaoqing Guan, Yichao Wang, Wenkai Yu, Yong Wei, Yang Lu, Enyu Dai, Xiaowu Dong, Bing Zhao, Can Hu, Li Yuan, Xin Luan, Kai Miao, Bonan Chen, Xiang-Dong Cheng\*, Weidong Zhang\* and Jiang-Jiang Qin\**



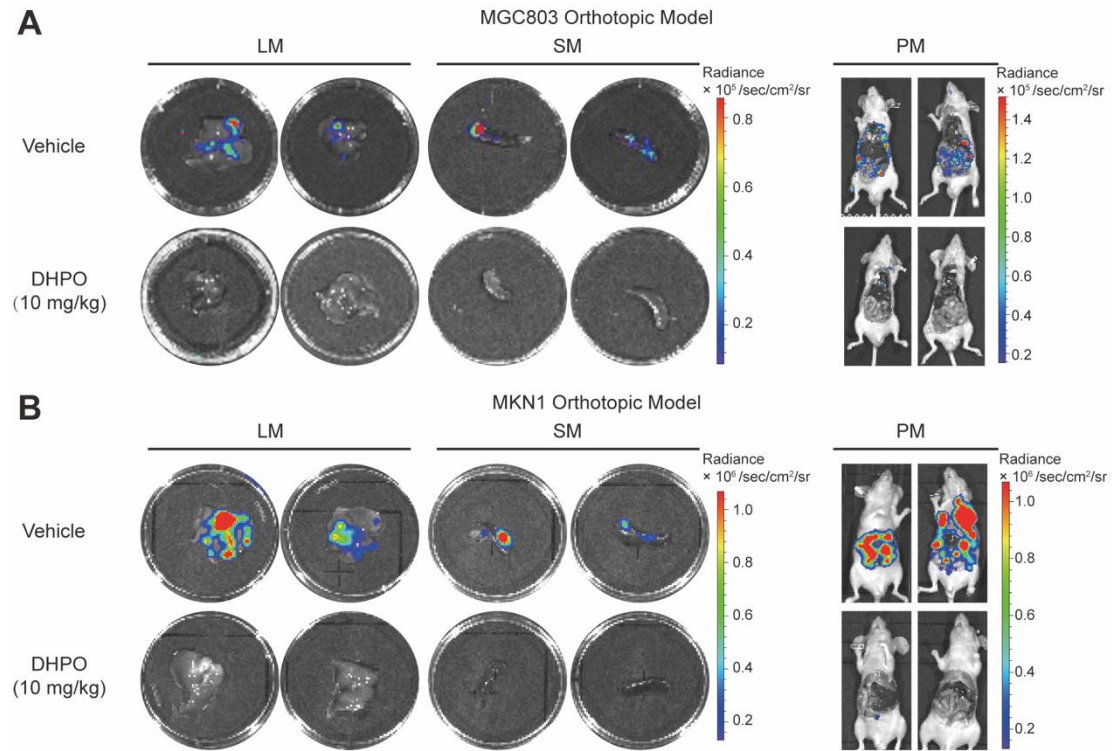

**Figure S2 DHPO suppresses metastasis in orthotopic tumor mouse models. (A and B)** Visualization of liver, spleen, and peritoneal metastases in orthotopic tumor SCID mouse models derived from MGC803 and MKN1 cells treated with vehicle control or DHPO (10 mg/kg).
